# Supplementary material for: Erythropoietin Activates Autophagy to Regulate Apoptosis and Angiogenesis of Periodontal Ligament Stem Cells via the Akt/ERK1/2/BAD Signaling Pathway under Inflammatory Microenvironment
Source: Hindawi journal article supplement (doi:10.1155/2022/9806887), 2022-09-20

Raw data of western blot

Figure 2

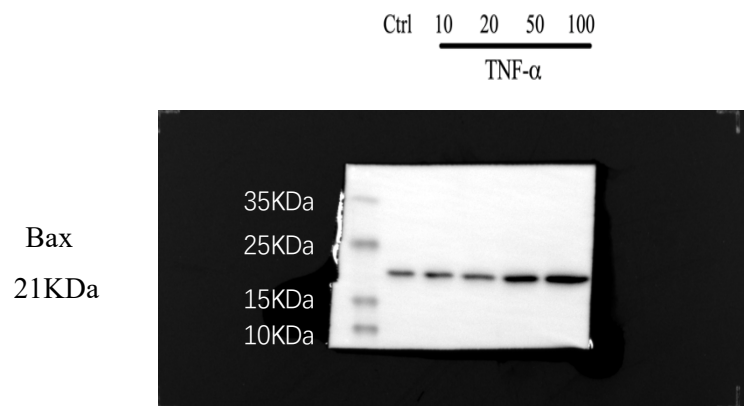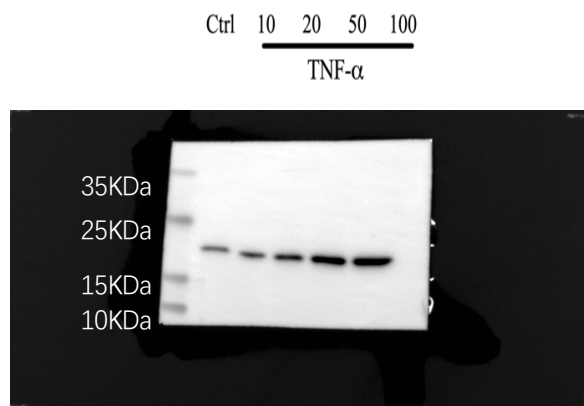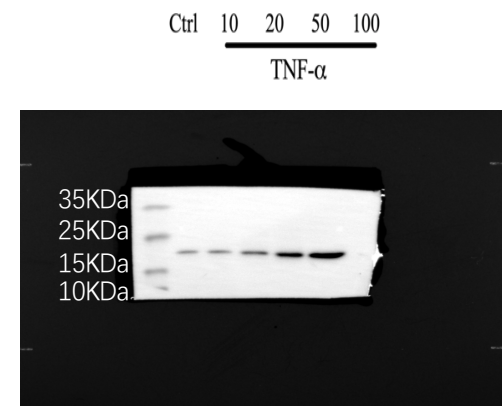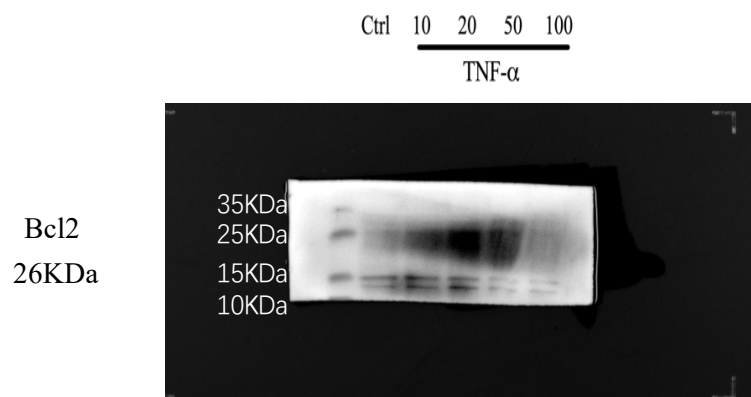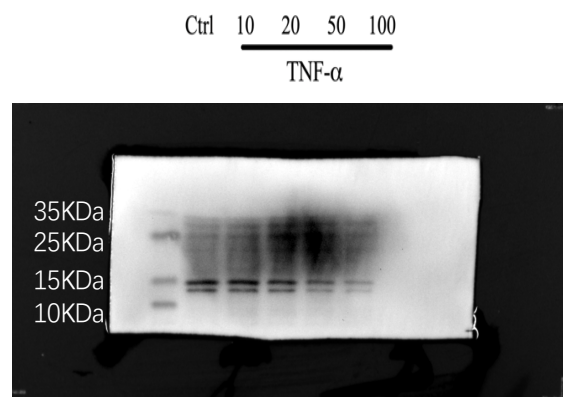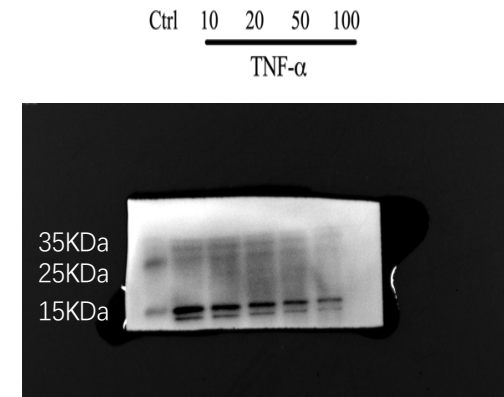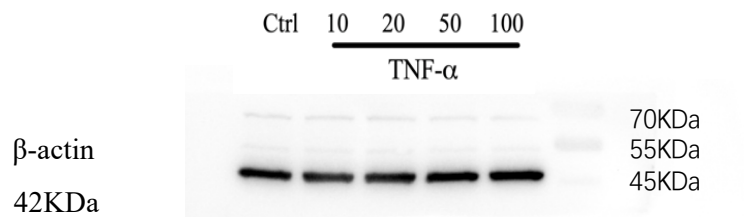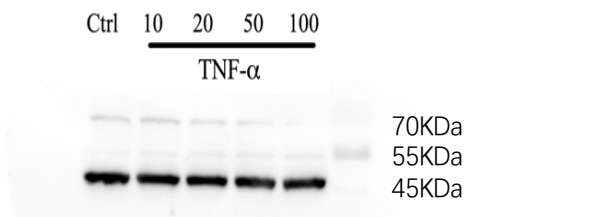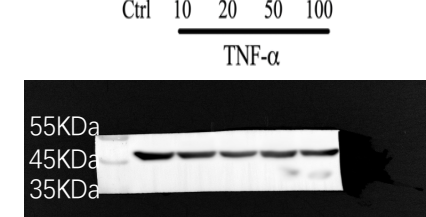

Figure 3

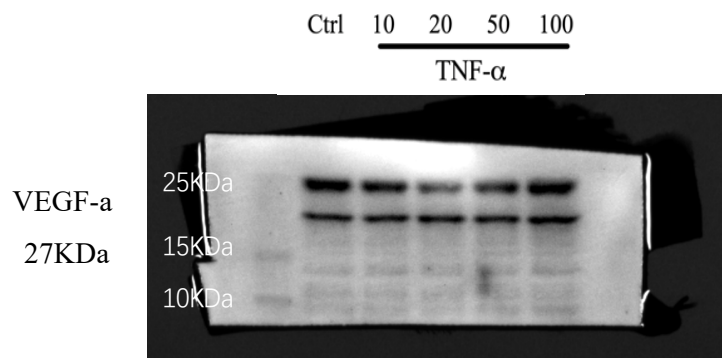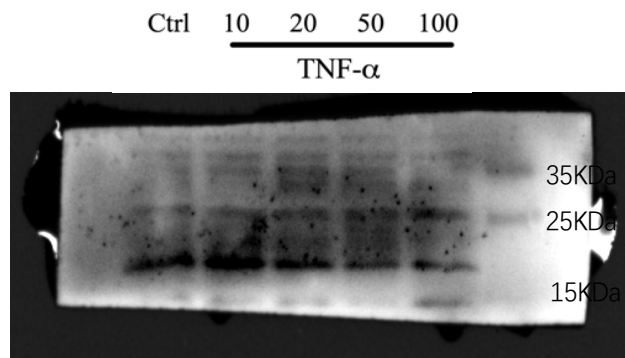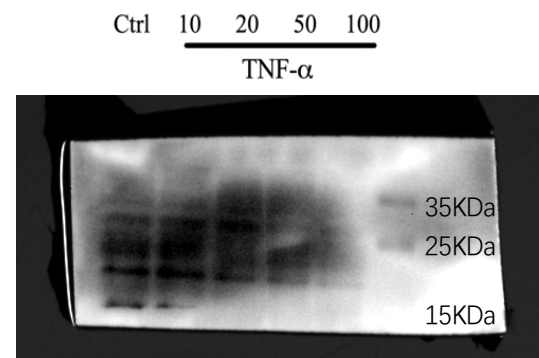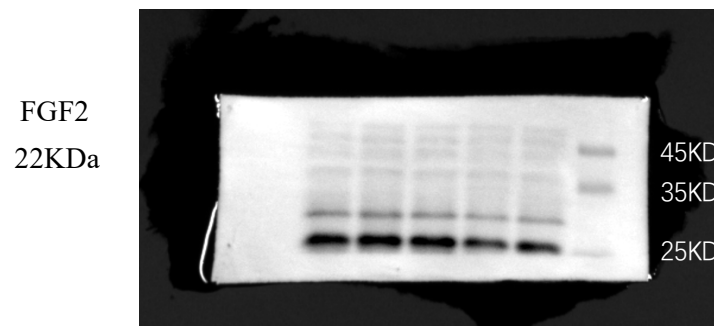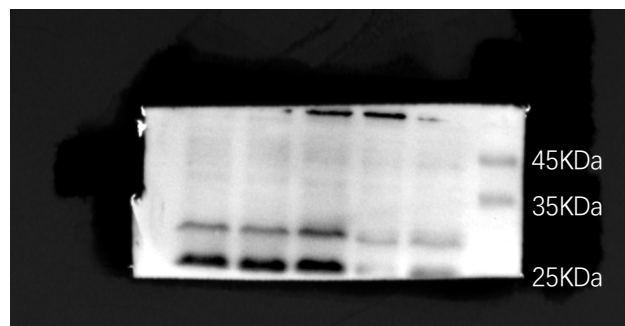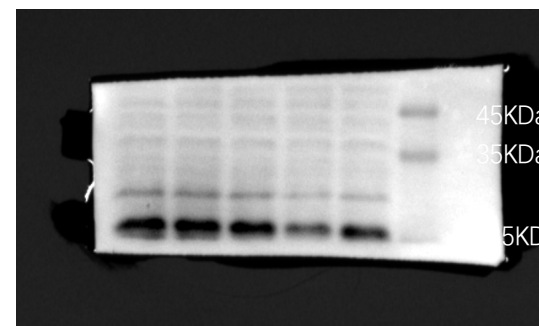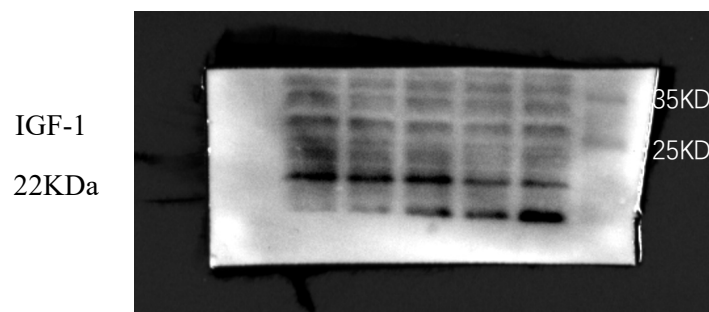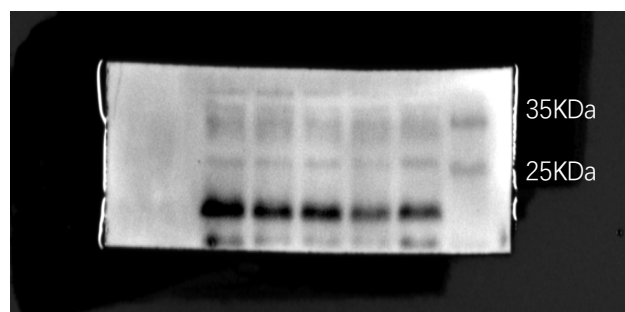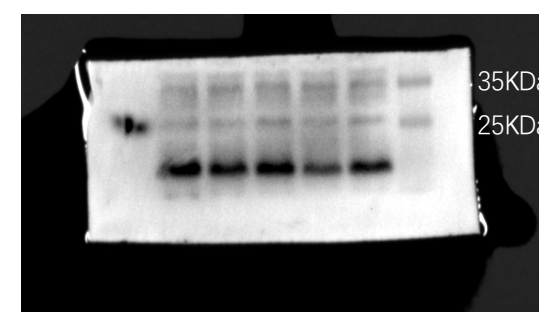

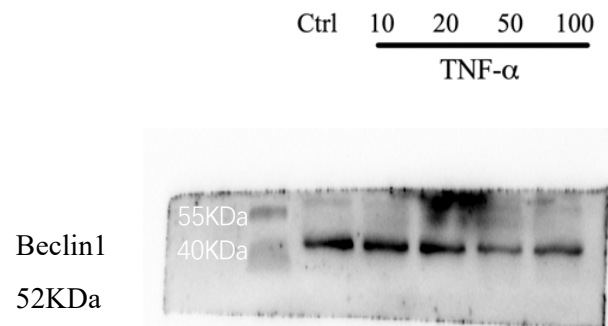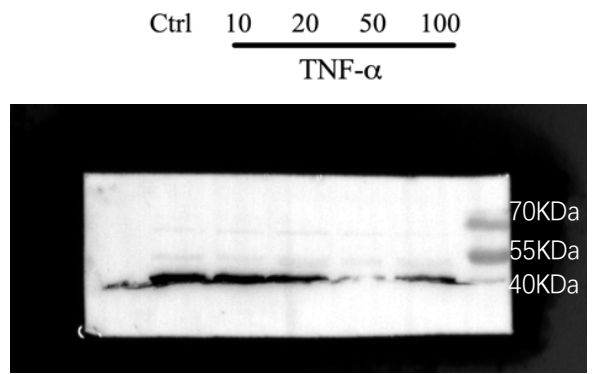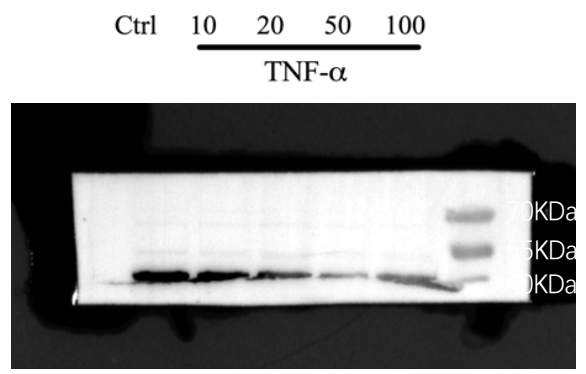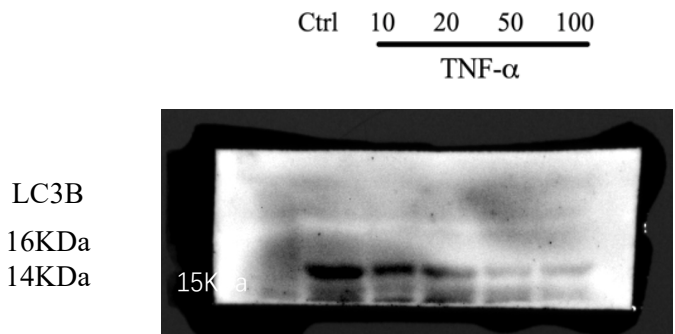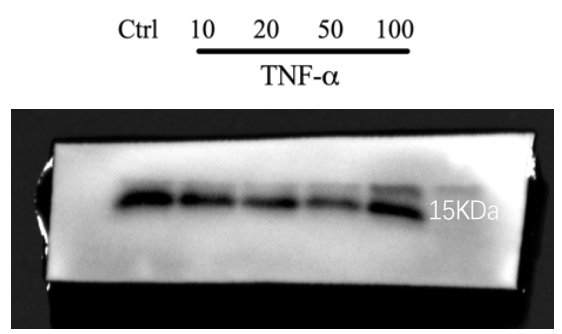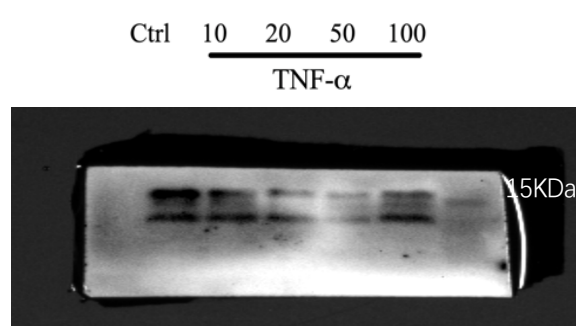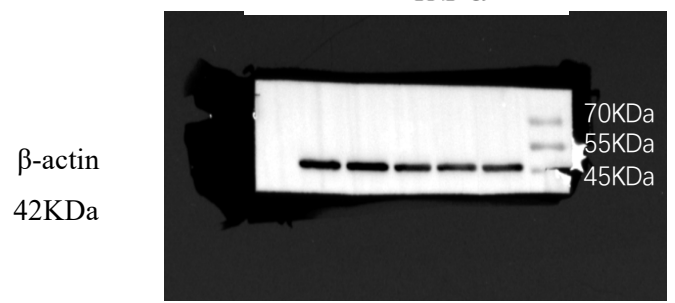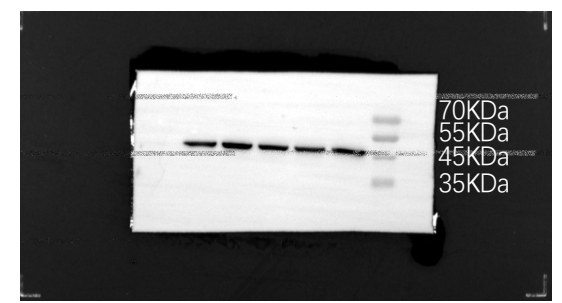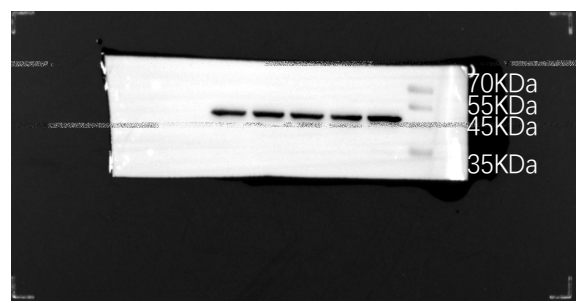

Figure 4

0 5 10 20 50  
EPO+TNF- $\alpha$

0 5 10 20 50  
EPO+TNF- $\alpha$

0 5 10 20 50  
EPO+TNF- $\alpha$

Bax  
21KDa

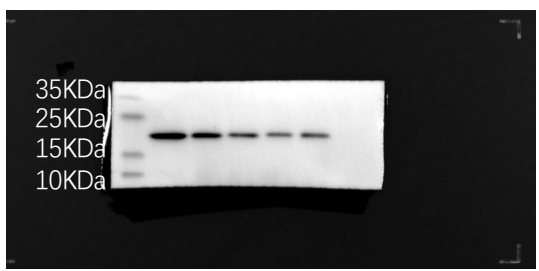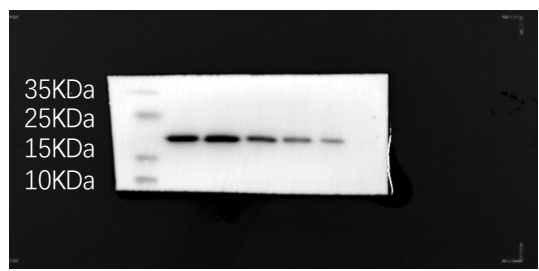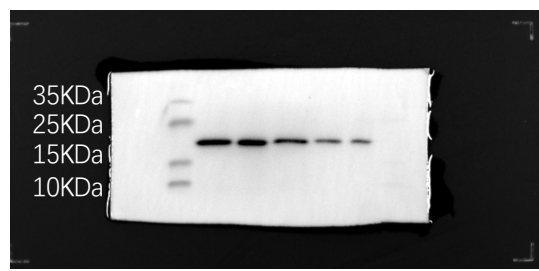

Bcl2  
26KDa

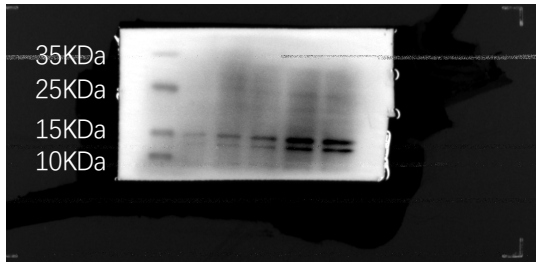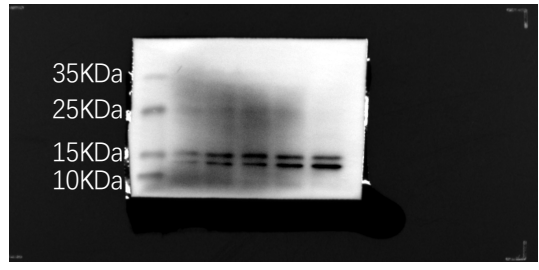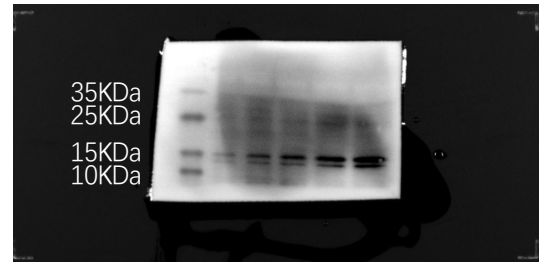

$\beta$ -actin  
42KDa

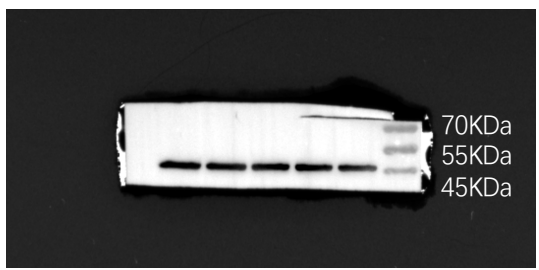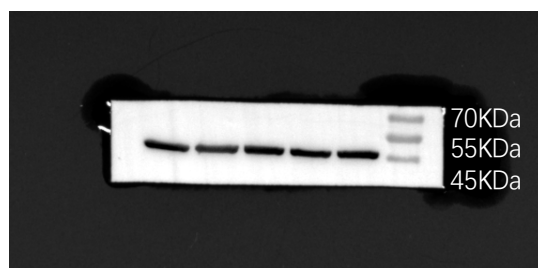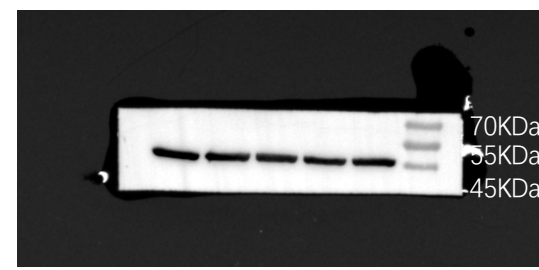



Figure 5

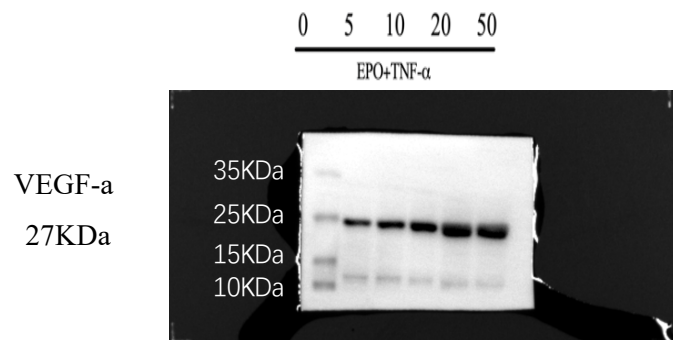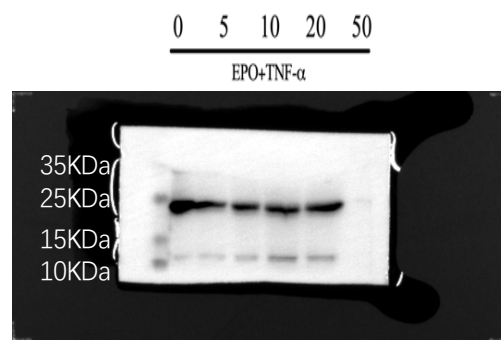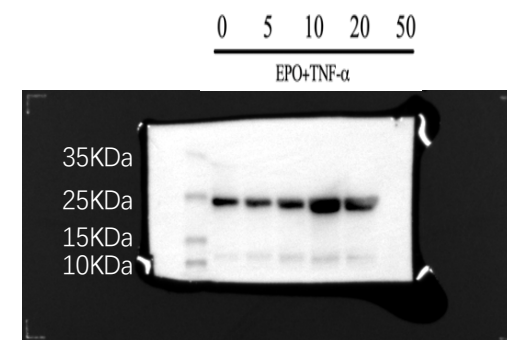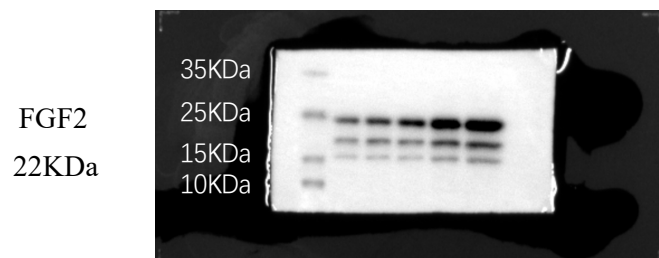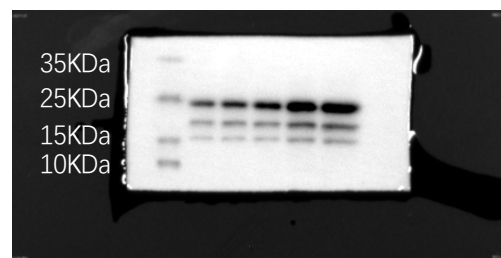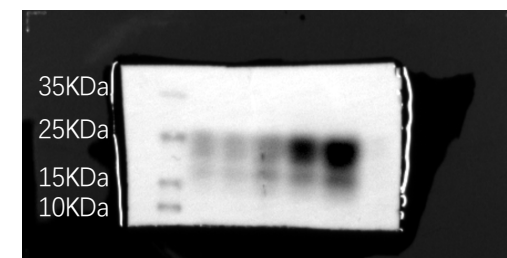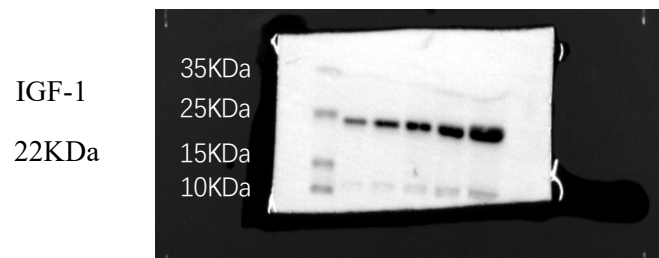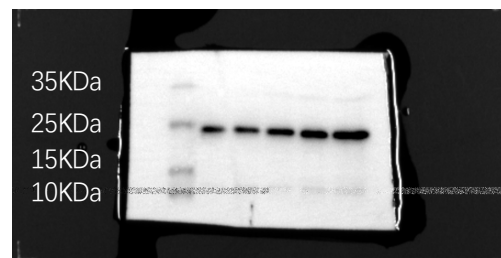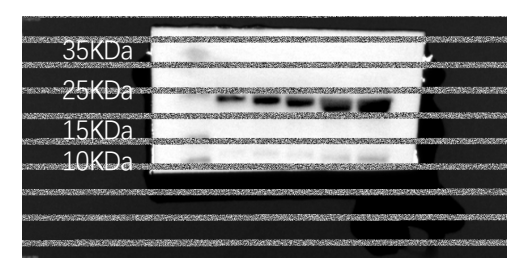

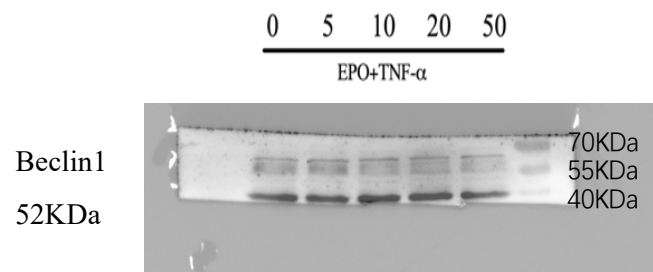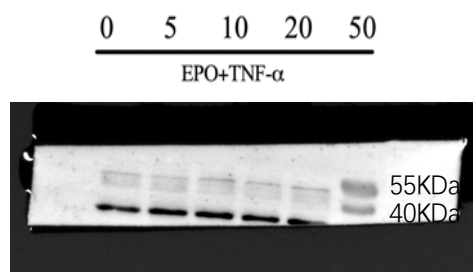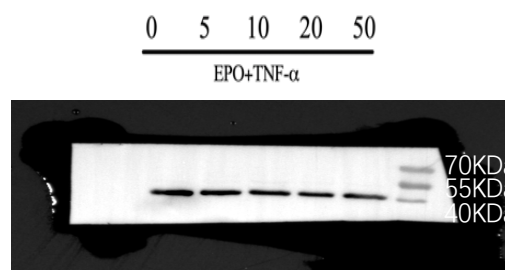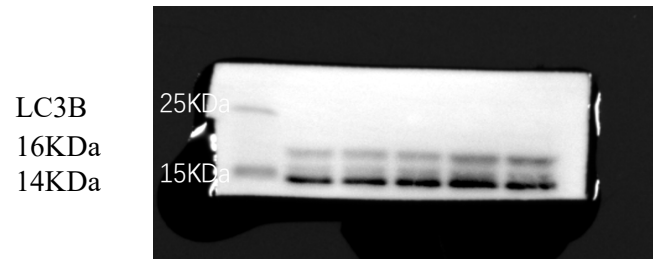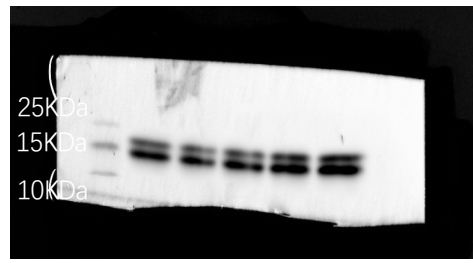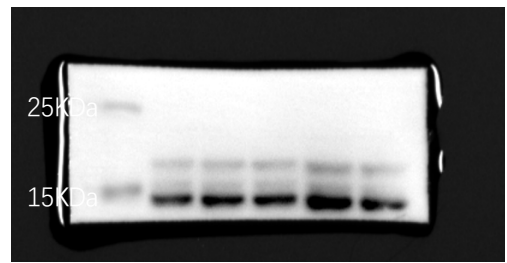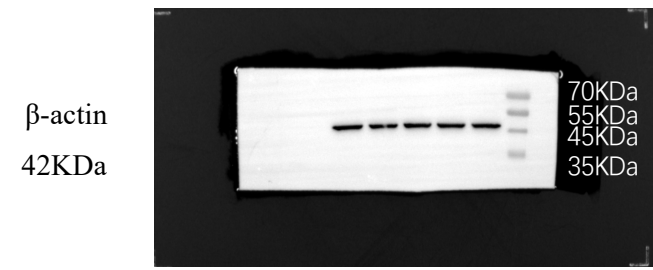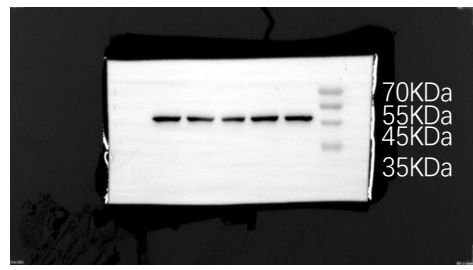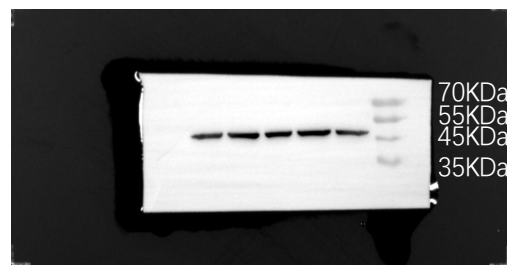

Figure 6

Akt  
56KDa

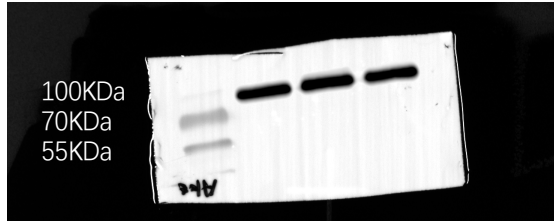

TNF- $\alpha$   
TNF- $\alpha$ +EPO+LY294002  
TNF- $\alpha$ +EPO

100KDa  
70KDa  
55KDa

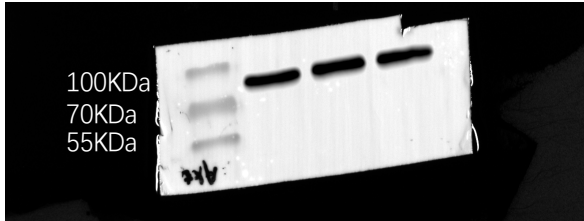

TNF- $\alpha$   
TNF- $\alpha$ +EPO+LY294002  
TNF- $\alpha$ +EPO

100KDa  
100KDa  
70KDa  
55KDa

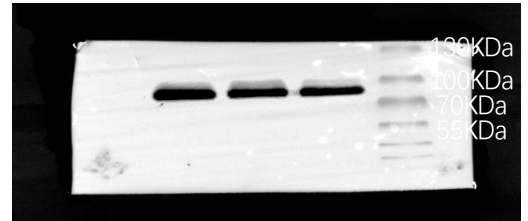

TNF- $\alpha$   
TNF- $\alpha$ +EPO+LY294002  
TNF- $\alpha$ +EPO

p-Akt  
56KDa

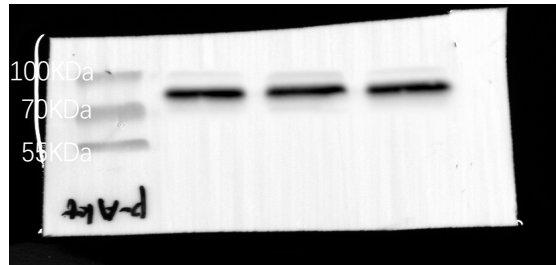

TNF- $\alpha$   
TNF- $\alpha$ +EPO+LY294002  
TNF- $\alpha$ +EPO

100KDa  
70KDa  
55KDa

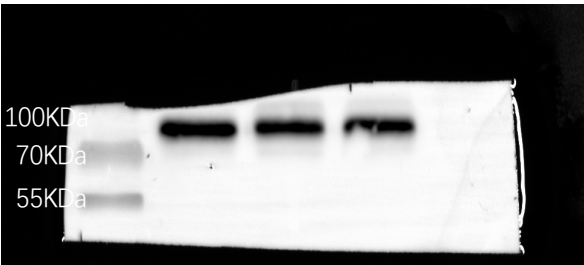

TNF- $\alpha$   
TNF- $\alpha$ +EPO+LY294002  
TNF- $\alpha$ +EPO

100KDa  
70KDa

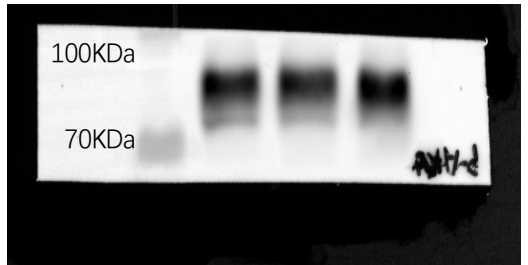

TNF- $\alpha$   
TNF- $\alpha$ +EPO+LY294002  
TNF- $\alpha$ +EPO

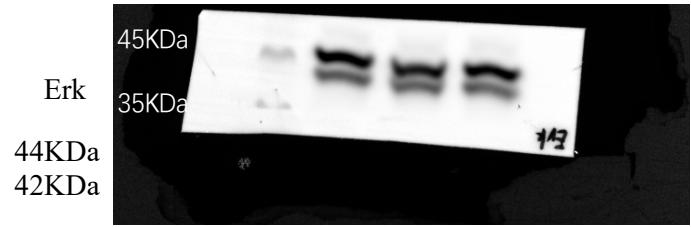

TNF- $\alpha$   
TNF- $\alpha$ +EPO+LY294002  
TNF- $\alpha$ +EPO

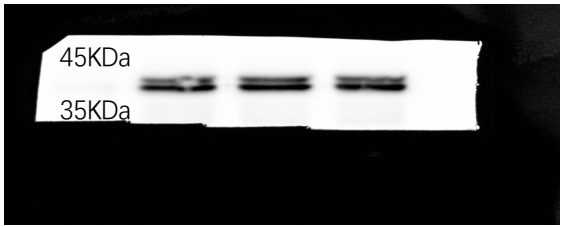

TNF- $\alpha$   
TNF- $\alpha$ +EPO+LY294002  
TNF- $\alpha$ +EPO

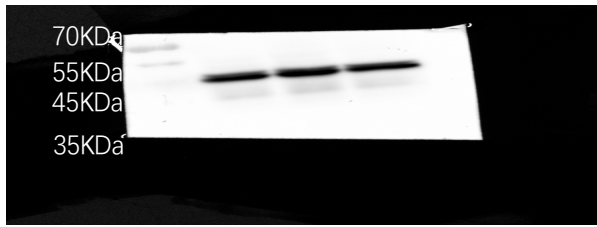

TNF- $\alpha$   
TNF- $\alpha$ +EPO+LY294002  
TNF- $\alpha$ +EPO

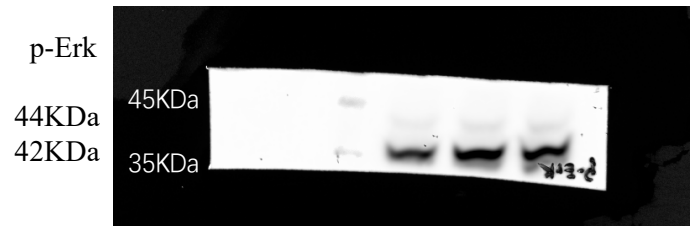

TNF- $\alpha$   
TNF- $\alpha$ +EPO+LY294002  
TNF- $\alpha$ +EPO

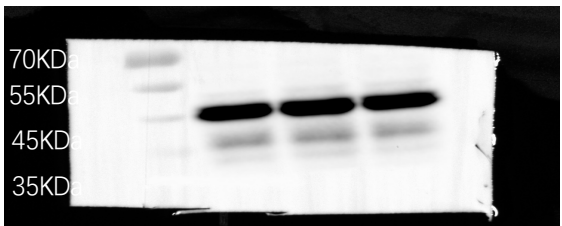

TNF- $\alpha$   
TNF- $\alpha$ +EPO+LY294002  
TNF- $\alpha$ +EPO

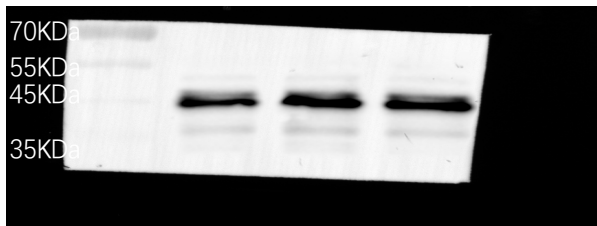

TNF- $\alpha$   
TNF- $\alpha$ +EPO+LY294002  
TNF- $\alpha$ +EPO

BAD  
22KDa  
20KDa

25KDa

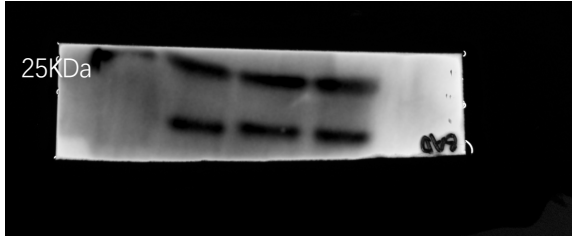

TNF- $\alpha$   
TNF- $\alpha$ +EPO+LY294002  
TNF- $\alpha$ +EPO

25KDa

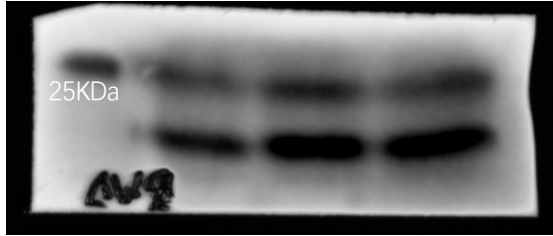

TNF- $\alpha$   
TNF- $\alpha$ +EPO+LY294002  
TNF- $\alpha$ +EPO

25KDa

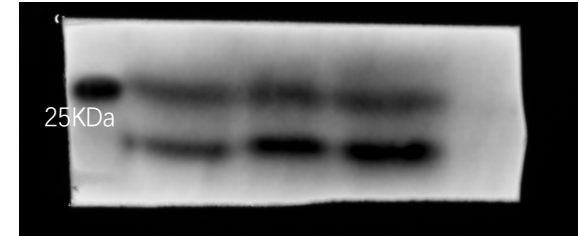

TNF- $\alpha$   
TNF- $\alpha$ +EPO+LY294002  
TNF- $\alpha$ +EPO

p-BAD  
22KDa  
20KDa

25KDa

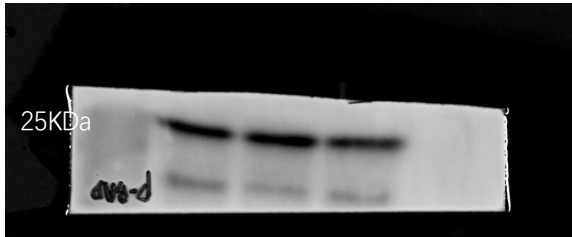

TNF- $\alpha$   
TNF- $\alpha$ +EPO+LY294002  
TNF- $\alpha$ +EPO

25KDa

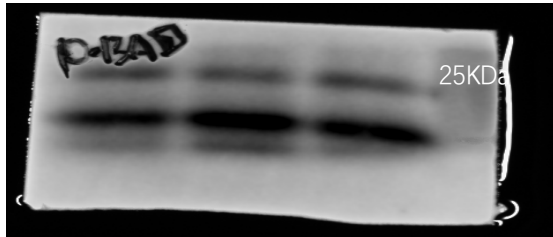

TNF- $\alpha$   
TNF- $\alpha$ +EPO+LY294002  
TNF- $\alpha$ +EPO

25KDa

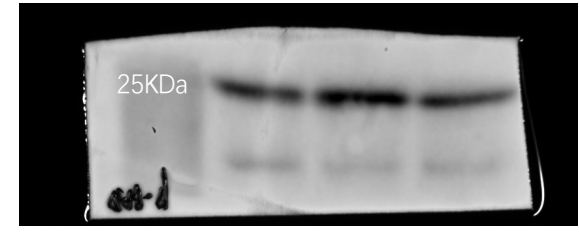

TNF- $\alpha$   
TNF- $\alpha$ +EPO+LY294002  
TNF- $\alpha$ +EPO

$\beta$ -actin  
42KDa

70KDa  
55KDa  
45KDa

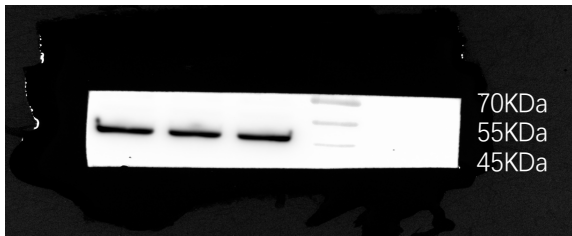

70KDa  
55KDa  
45KDa

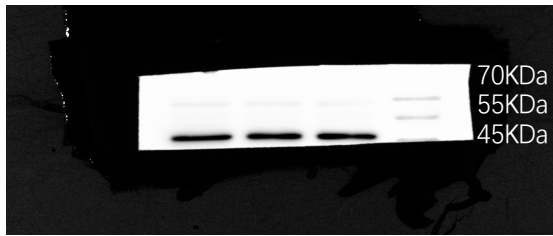

70KDa  
55KDa  
45KDa

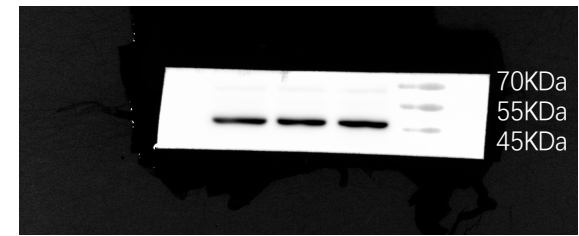

VEGF-a  
27KDa

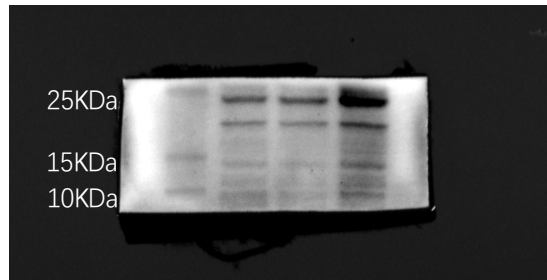

TNF-α  
TNF-α+EPO+LY294002  
TNF-α+EPO

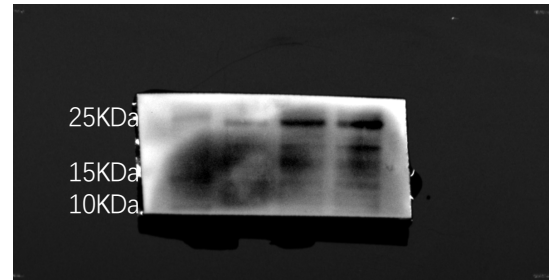

TNF-α  
TNF-α+EPO+LY294002  
TNF-α+EPO

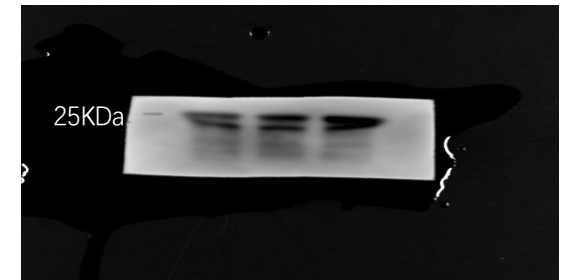

TNF-α  
TNF-α+EPO+LY294002  
TNF-α+EPO

FGF2  
22KDa

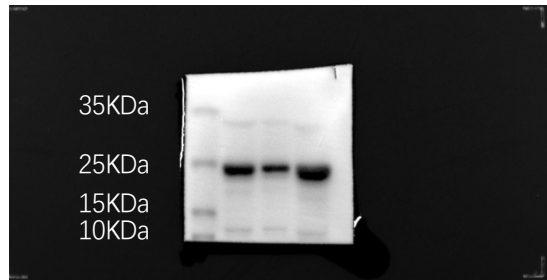

TNF-α  
TNF-α+EPO+LY294002  
TNF-α+EPO

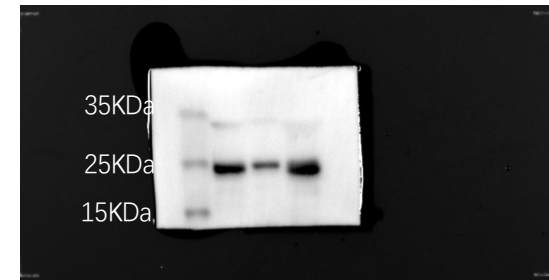

TNF-α  
TNF-α+EPO+LY294002  
TNF-α+EPO

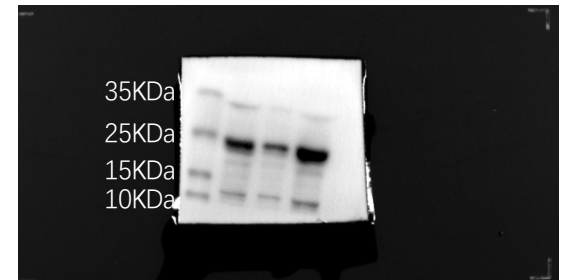

TNF-α  
TNF-α+EPO+LY294002  
TNF-α+EPO

IGF-1  
22KDa

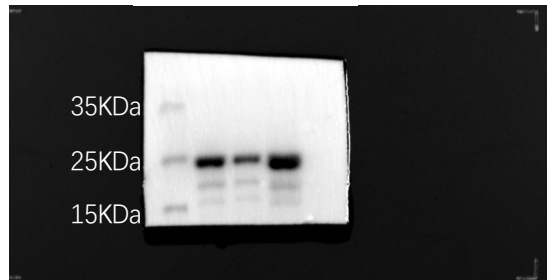

TNF-α  
TNF-α+EPO+LY294002  
TNF-α+EPO

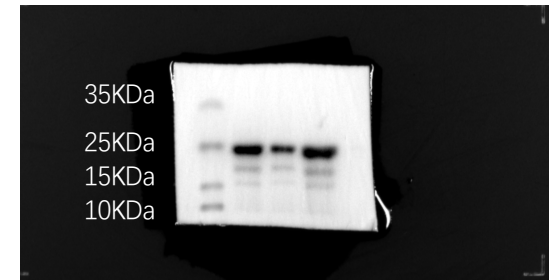

TNF-α  
TNF-α+EPO+LY294002  
TNF-α+EPO

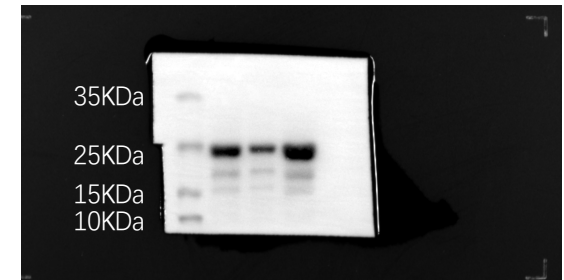

TNF-α  
TNF-α+EPO+LY294002  
TNF-α+EPO



Bax  
21KDa

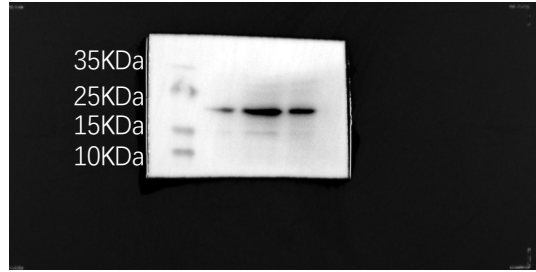

TNF- $\alpha$   
TNF- $\alpha$ +EPO+LY294002  
TNF- $\alpha$ +EPO

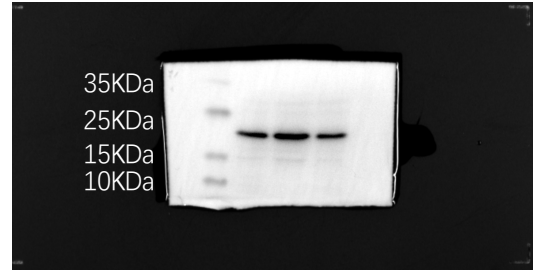

TNF- $\alpha$   
TNF- $\alpha$ +EPO+LY294002  
TNF- $\alpha$ +EPO

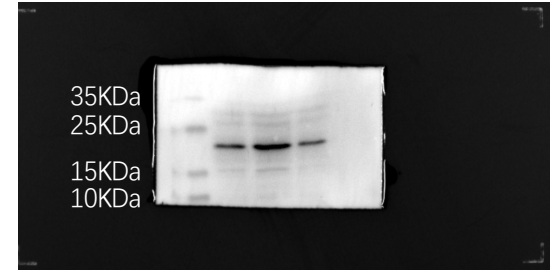

TNF- $\alpha$   
TNF- $\alpha$ +EPO+LY294002  
TNF- $\alpha$ +EPO

Bcl2  
26KDa

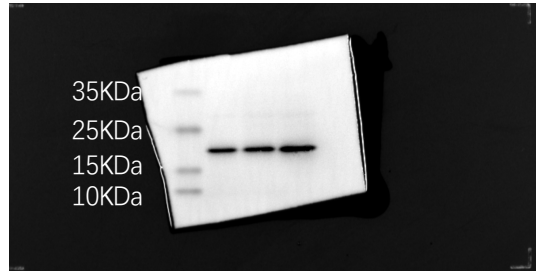

TNF- $\alpha$   
TNF- $\alpha$ +EPO+LY294002  
TNF- $\alpha$ +EPO

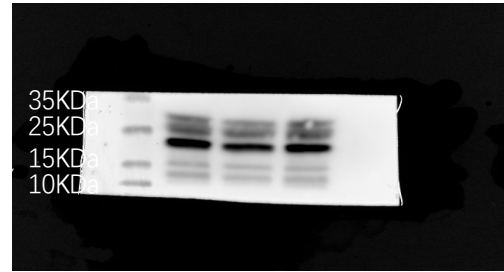

TNF- $\alpha$   
TNF- $\alpha$ +EPO+LY294002  
TNF- $\alpha$ +EPO

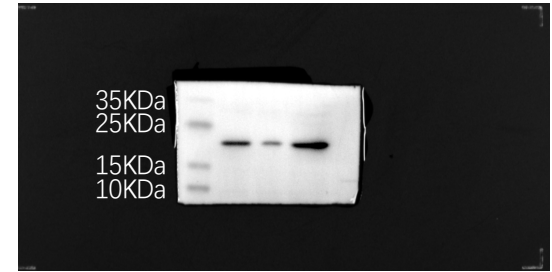

TNF- $\alpha$   
TNF- $\alpha$ +EPO+LY294002  
TNF- $\alpha$ +EPO

Beclin1  
52KDa

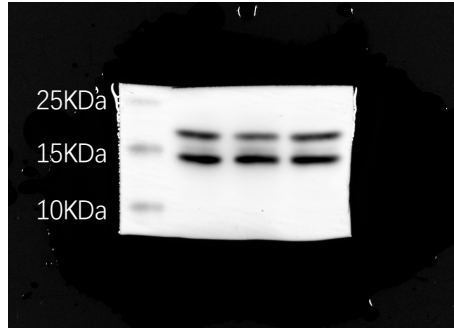

TNF-α  
TNF-α+EPO+LY294002  
TNF-α+EPO

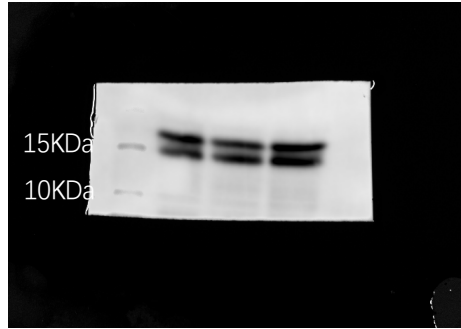

TNF-α  
TNF-α+EPO+LY294002  
TNF-α+EPO

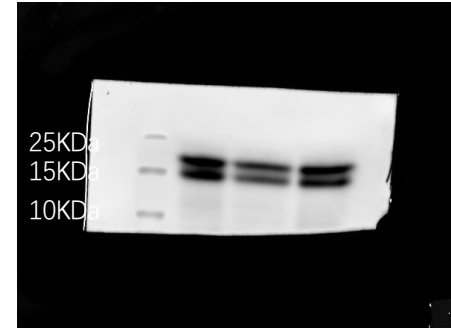

TNF-α  
TNF-α+EPO+LY294002  
TNF-α+EPO

LC3B  
16KDa  
14KDa

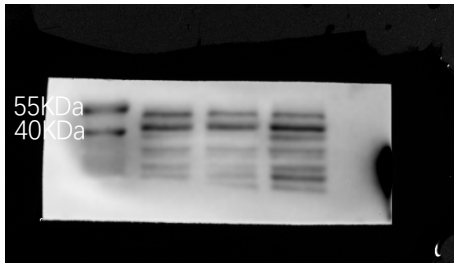

TNF-α  
TNF-α+EPO+LY294002  
TNF-α+EPO

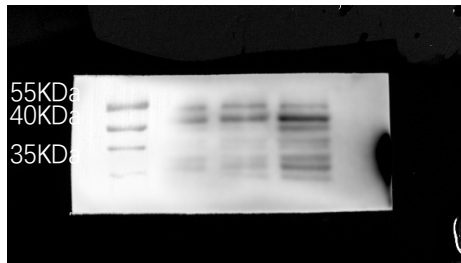

TNF-α  
TNF-α+EPO+LY294002  
TNF-α+EPO

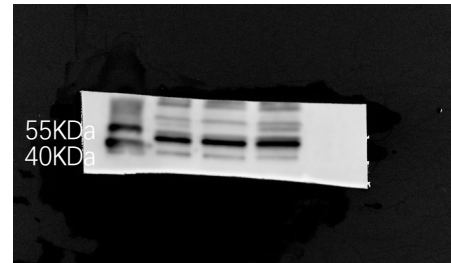

TNF-α  
TNF-α+EPO+LY294002  
TNF-α+EPO

β-actin  
42KDa

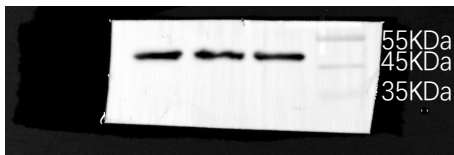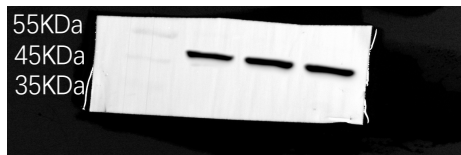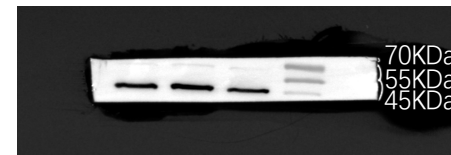

Figure 7

VEGF-a  
27KDa

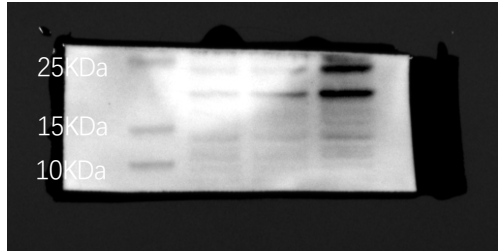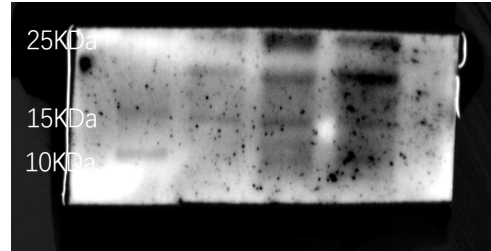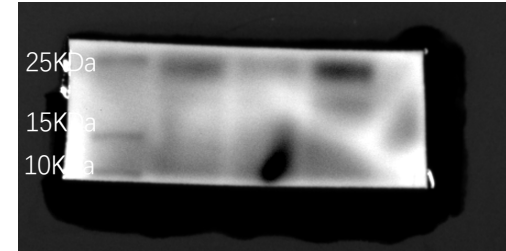

TNF-α  
TNF-α+EPO+3-MA  
TNF-α+EPO

TNF-α  
TNF-α+EPO+3-MA  
TNF-α+EPO

TNF-α  
TNF-α+EPO+3-MA  
TNF-α+EPO

FGF2  
22KDa

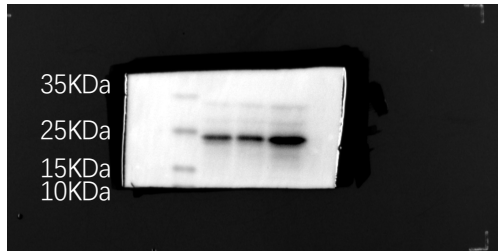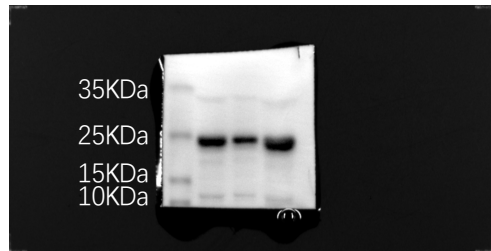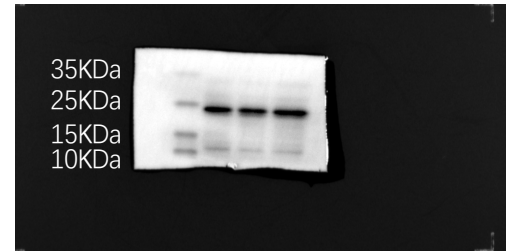

TNF-α  
TNF-α+EPO+3-MA  
TNF-α+EPO

TNF-α  
TNF-α+EPO+3-MA  
TNF-α+EPO

TNF-α  
TNF-α+EPO+3-MA  
TNF-α+EPO

IGF-1  
22KDa

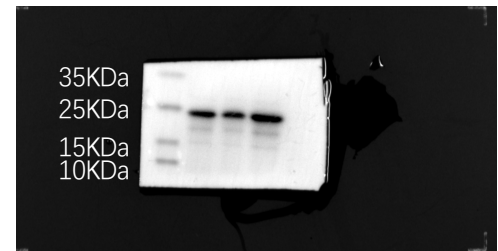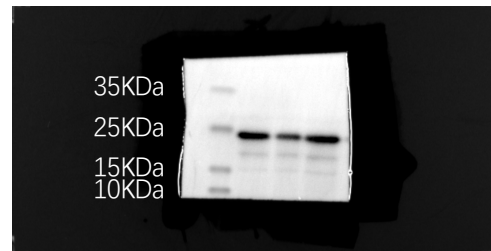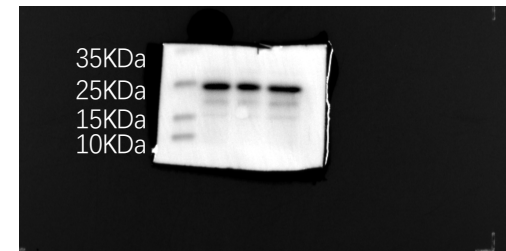

TNF-α  
TNF-α+EPO+3-MA  
TNF-α+EPO

TNF-α  
TNF-α+EPO+3-MA  
TNF-α+EPO

TNF-α  
TNF-α+EPO+3-MA  
TNF-α+EPO

Bax  
21KDa

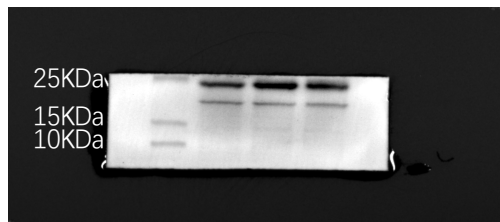

TNF- $\alpha$   
TNF- $\alpha$ +EPO+3-MA  
TNF- $\alpha$ +EPO

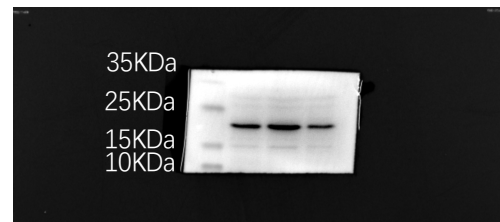

TNF- $\alpha$   
TNF- $\alpha$ +EPO+3-MA  
TNF- $\alpha$ +EPO

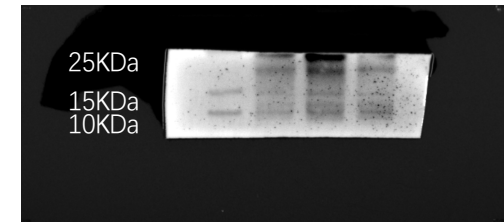

TNF- $\alpha$   
TNF- $\alpha$ +EPO+3-MA  
TNF- $\alpha$ +EPO

Bcl2  
26KDa

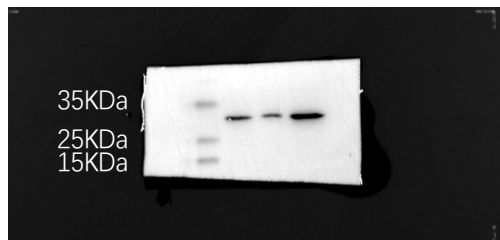

TNF- $\alpha$   
TNF- $\alpha$ +EPO+3-MA  
TNF- $\alpha$ +EPO

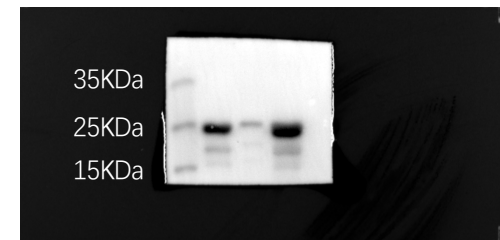

TNF- $\alpha$   
TNF- $\alpha$ +EPO+3-MA  
TNF- $\alpha$ +EPO

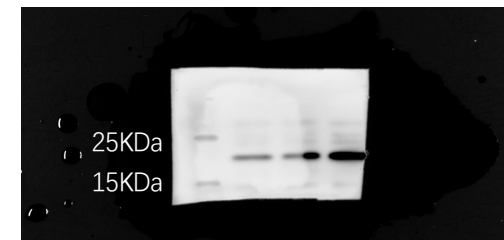

TNF- $\alpha$   
TNF- $\alpha$ +EPO+3-MA  
TNF- $\alpha$ +EPO

LC3B  
16KDa  
14KDa

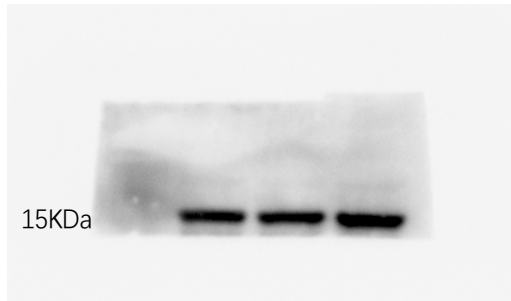

TNF- $\alpha$   
TNF- $\alpha$ +EPO+3-MA  
TNF- $\alpha$ +EPO

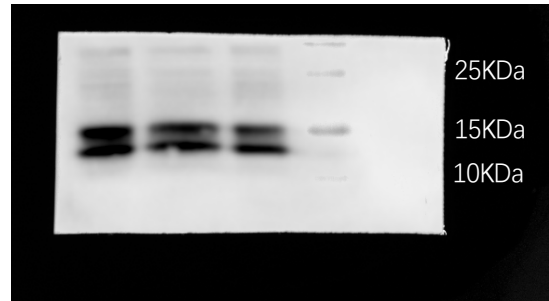

TNF- $\alpha$   
TNF- $\alpha$ +EPO+3-MA  
TNF- $\alpha$ +EPO

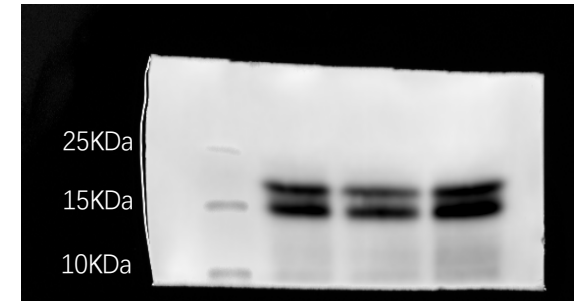

TNF- $\alpha$   
TNF- $\alpha$ +EPO+3-MA  
TNF- $\alpha$ +EPO

Beclin1  
70KDa  
52KDa

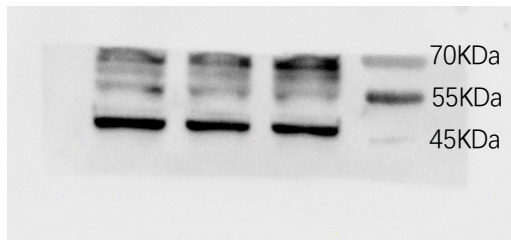

TNF- $\alpha$ +EPO  
TNF- $\alpha$ +EPO+3-MA  
TNF- $\alpha$

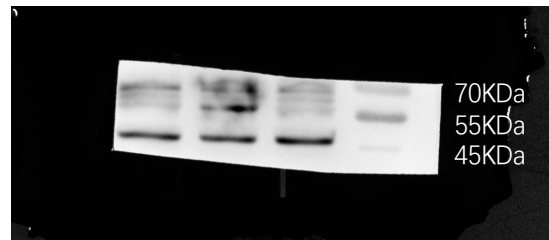

TNF- $\alpha$   
TNF- $\alpha$ +EPO+3-MA  
TNF- $\alpha$ +EPO

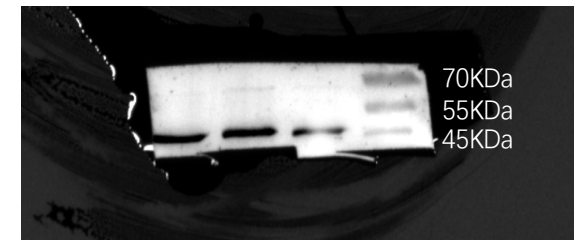

TNF- $\alpha$ +EPO  
TNF- $\alpha$ +EPO+3-MA  
TNF- $\alpha$

$\beta$ -actin  
42KDa

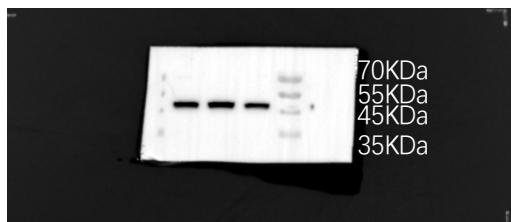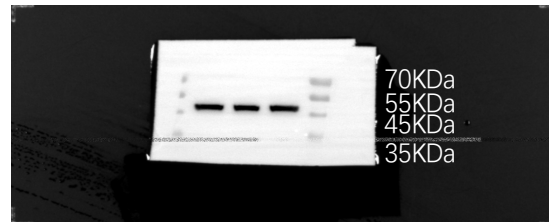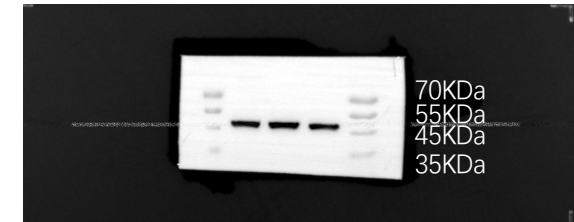

Supplement: f1 [file 9806887.f1.pdf]
