# Supplementary material for: Erythropoietin Activates Autophagy to Regulate Apoptosis and Angiogenesis of Periodontal Ligament Stem Cells via the Akt/ERK1/2/BAD Signaling Pathway under Inflammatory Microenvironment
Source: Hindawi journal article supplement (doi:10.1155/2022/9806887), 2022-09-20

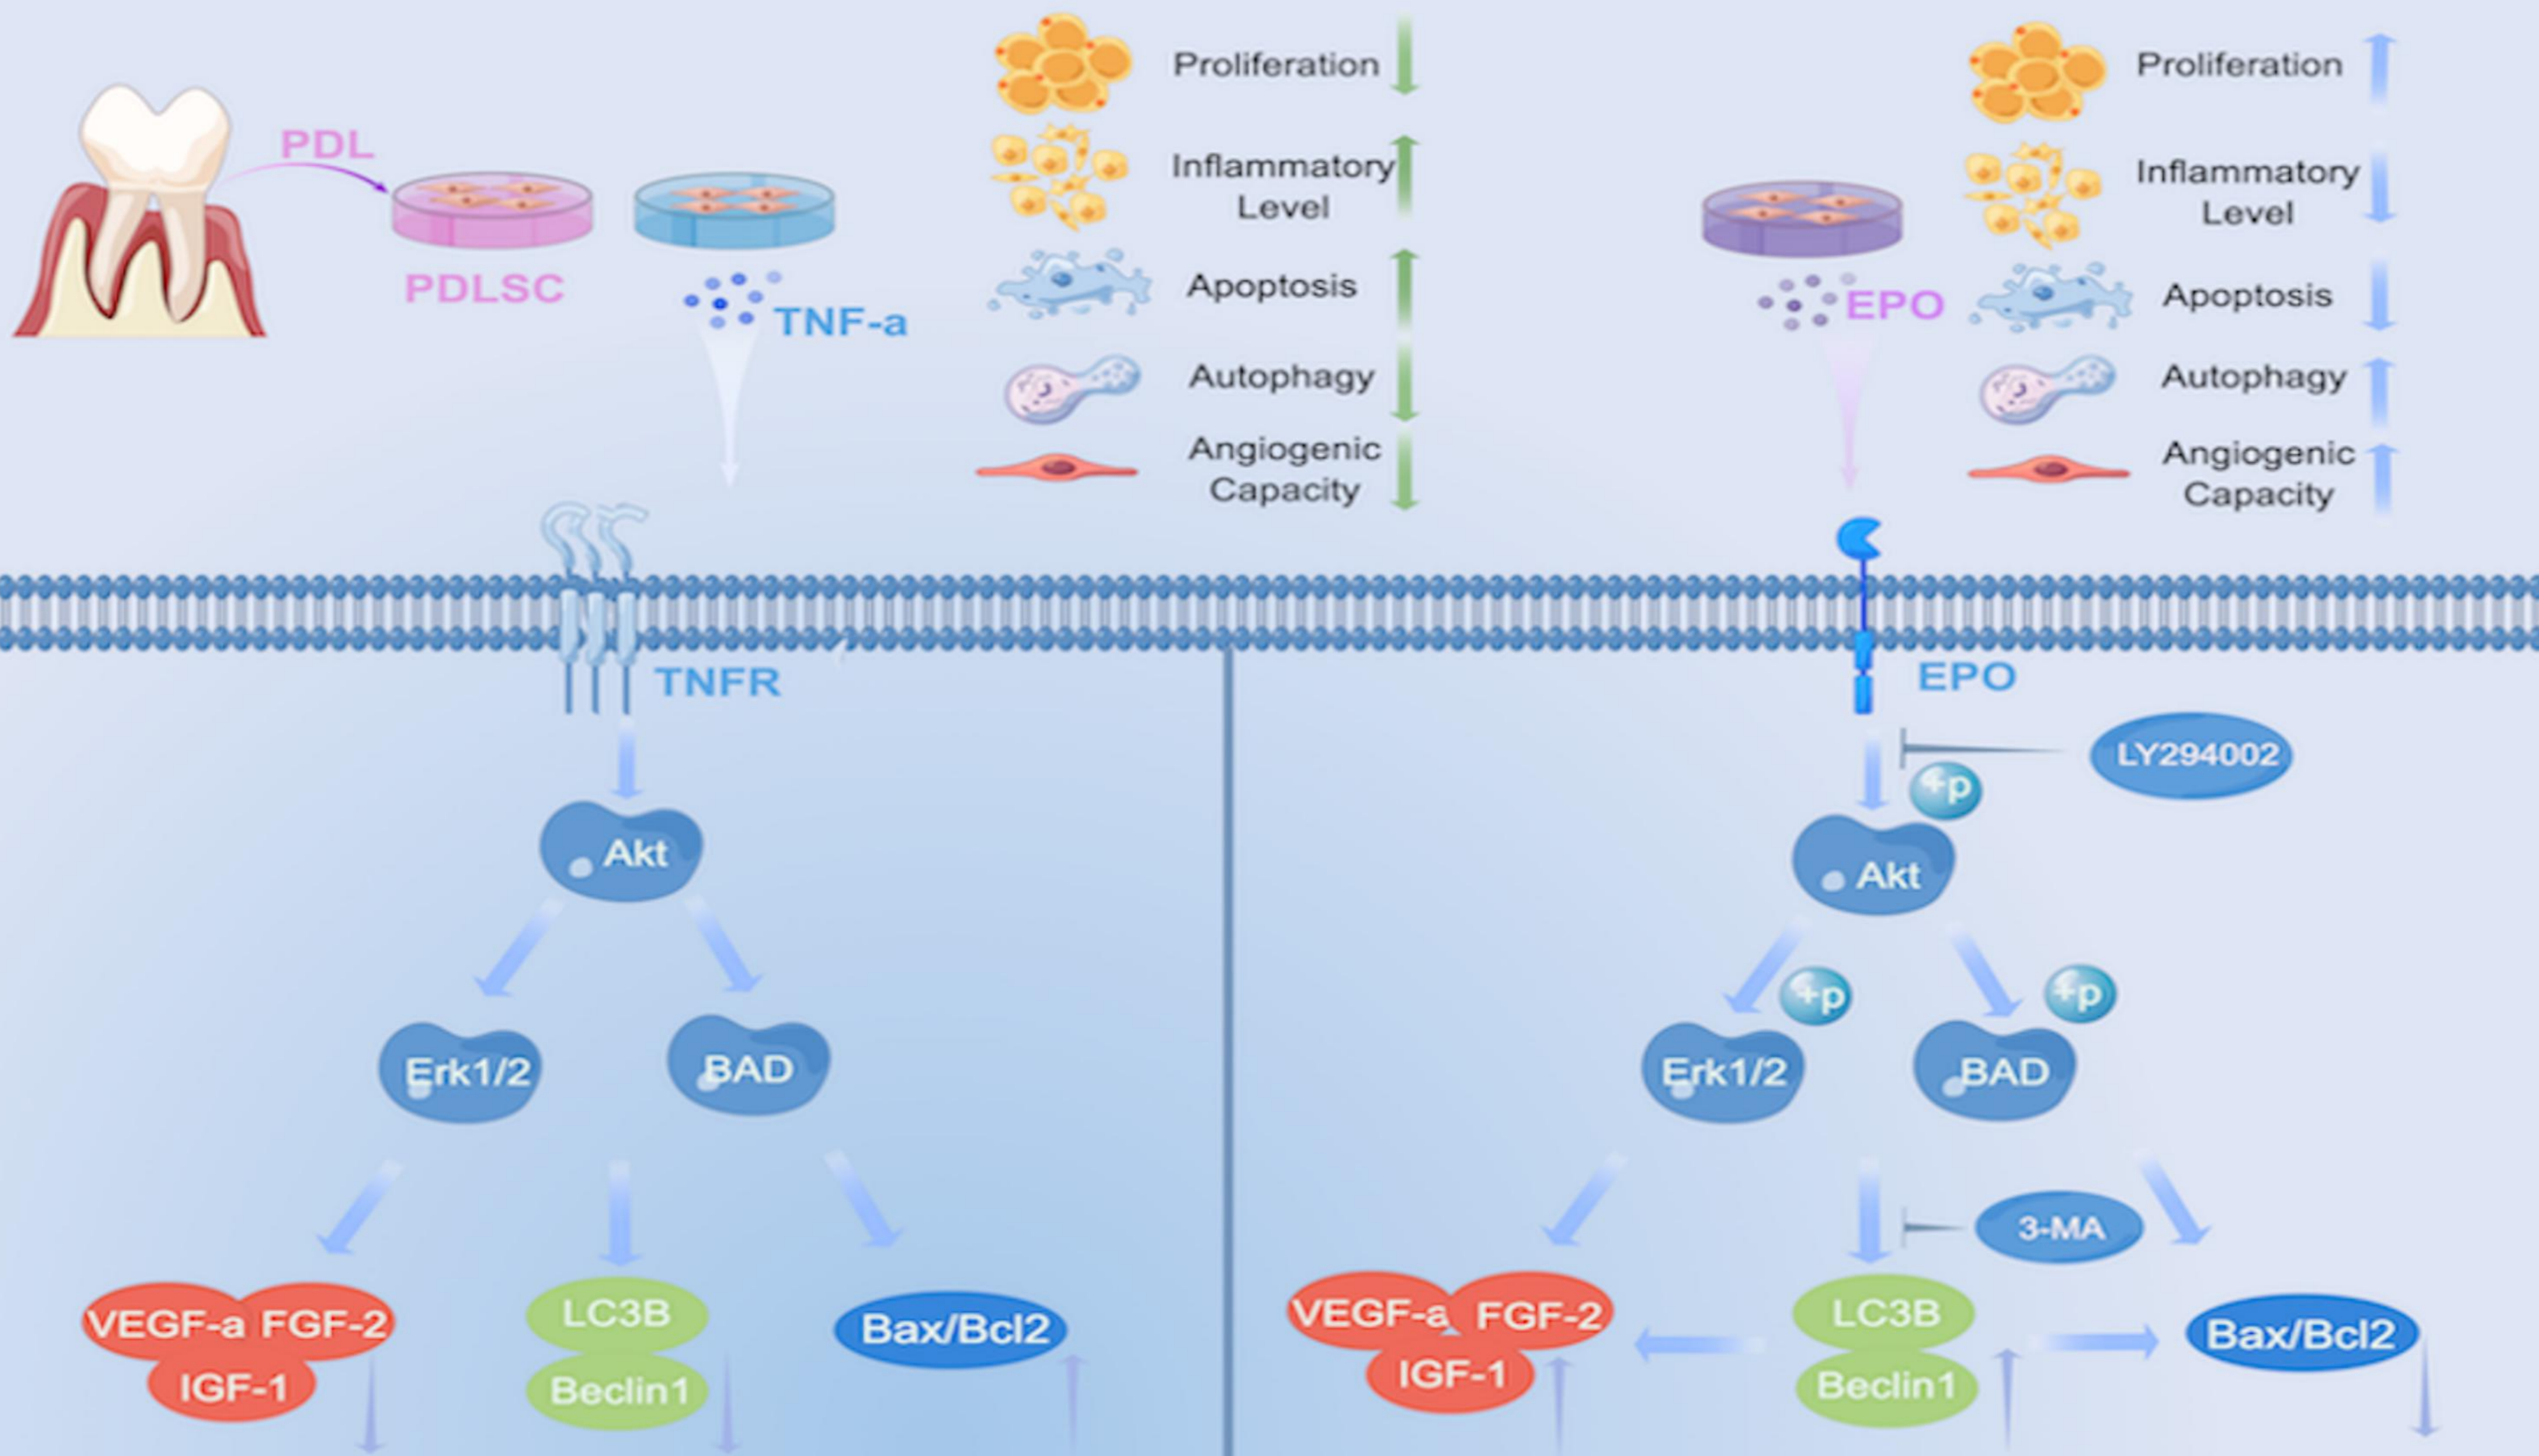

Supplement: f2 [file 9806887.f2.pdf]
